# Supplementary material for: Clade I Mpox virus genomic diversity in the Democratic Republic of the Congo, 2018 - 2024: Predominance of Zoonotic Transmission
Source: bioRxiv or medRxiv preprint supplement (doi:10.1101/2024.08.13.24311951), 2024-08-22
Supplement: Supplementary file [file media-1.pdf]

## Supplementary Tables

|                                                                                                                                                                                               |   |
|-----------------------------------------------------------------------------------------------------------------------------------------------------------------------------------------------|---|
| Supplementary table 1 : Previously published MPXV genomes used in the phylogenetic analysis as contextual genomes with NCBI Genbank accession number (Accession) and related information..... | 2 |
| Supplementary table 2 : List of SNP and AA changes within main clades and clusters.....                                                                                                       | 7 |

## Supplemental tables

*Supplementary table 1 : Previously published MPXV genomes used in the phylogenetic analysis as contextual genomes with NCBI Genbank accession number (Accession) and related information*

| accession | isolate        | Host         | Country                          | year | Clade | Authors        |
|-----------|----------------|--------------|----------------------------------|------|-------|----------------|
| DQ011154  | Congo_2003_358 | Homo sapiens | Republic of Congo                | 2003 | Ia    | Likos et al    |
| DQ011155  | Zaire_1979-005 | Homo sapiens | Democratic Republic of the Congo | 1978 | Ia    | Likos et al    |
| JX878407  | DRC 06-0950    | Homo sapiens | Democratic Republic of the Congo | 2006 | Ia    | Kugelman et al |
| JX878408  | DRC 06-0970    | Homo sapiens | Democratic Republic of the Congo | 2006 | Ia    | Kugelman et al |
| JX878409  | DRC 06-0999    | Homo sapiens | Democratic Republic of the Congo | 2006 | Ia    | Kugelman et al |
| JX878410  | DRC 06-1070    | Homo sapiens | Democratic Republic of the Congo | 2006 | Ia    | Kugelman et al |
| JX878411  | DRC 06-1075    | Homo sapiens | Democratic Republic of the Congo | 2006 | Ia    | Kugelman et al |
| JX878412  | DRC 06-1076    | Homo sapiens | Democratic Republic of the Congo | 2006 | Ia    | Kugelman et al |
| JX878413  | DRC 07-0045    | Homo sapiens | Democratic Republic of the Congo | 2006 | Ia    | Kugelman et al |
| JX878414  | DRC 07-0046    | Homo sapiens | Democratic Republic of the Congo | 2006 | Ia    | Kugelman et al |
| JX878415  | DRC 07-0092    | Homo sapiens | Democratic Republic of the Congo | 2006 | Ia    | Kugelman et al |
| JX878416  | DRC 07-0093    | Homo sapiens | Democratic Republic of the Congo | 2006 | Ia    | Kugelman et al |
| JX878417  | DRC 07-0104    | Homo sapiens | Democratic Republic of the Congo | 2006 | Ia    | Kugelman et al |
| JX878418  | DRC 07-0120    | Homo sapiens | Democratic Republic of the Congo | 2007 | Ia    | Kugelman et al |
| JX878419  | DRC 07-0275    | Homo sapiens | Democratic Republic of the Congo | 2007 | Ia    | Kugelman et al |
| JX878420  | DRC 07-0283    | Homo sapiens | Democratic Republic of the Congo | 2007 | Ia    | Kugelman et al |
| JX878421  | DRC 07-0286    | Homo sapiens | Democratic Republic of the Congo | 2007 | Ia    | Kugelman et al |
| JX878422  | DRC 07-0287    | Homo sapiens | Democratic Republic of the Congo | 2007 | Ia    | Kugelman et al |
| JX878423  | DRC 07-0337    | Homo sapiens | Democratic Republic of the Congo | 2007 | Ia    | Kugelman et al |
| JX878424  | DRC 07-0338    | Homo sapiens | Democratic Republic of the Congo | 2007 | Ia    | Kugelman et al |
| JX878425  | DRC 07-0354    | Homo sapiens | Democratic Republic of the Congo | 2007 | Ia    | Kugelman et al |
| JX878426  | DRC 07-0450    | Homo sapiens | Democratic Republic of the Congo | 2007 | Ia    | Kugelman et al |
| JX878427  | DRC 07-0480    | Homo sapiens | Democratic Republic of the Congo | 2007 | Ia    | Kugelman et al |
| JX878428  | DRC 07-0514    | Homo sapiens | Democratic Republic of the Congo | 2007 | Ia    | Kugelman et al |

| accession | isolate                | Host                   | Country                          | year | Clade | Authors                |
|-----------|------------------------|------------------------|----------------------------------|------|-------|------------------------|
| JX878429  | DRC 07-0662            | Homo sapiens           | Democratic Republic of the Congo | 2007 | Ia    | Kugelman et al         |
| KC257459  |                        | Homo sapiens           | Sudan                            | 2005 | Ia    | Nakazawa,Y., et al.    |
| KC257460  | KC257460               | Homo sapiens           | Democratic Republic of the Congo | 1985 | Ia    | Nakazawa et al         |
| KJ642612  | KJ642612               | Homo sapiens           | Democratic Republic of the Congo | 1986 | Ia    | Nakazawa et al         |
| KJ642613  | KJ642613               | Homo sapiens           | Democratic Republic of the Congo | 1970 | Ia    | Nakazawa et al         |
| KJ642618  | KJ642618               | Homo sapiens           | Cameroon                         | 1989 | Ia    | Nakazawa et al         |
| KJ642619  | KJ642619               | Homo sapiens           | Gabon                            | 1987 | Ia    | Nakazawa et al         |
| KP849469  | Boende_DRC_2008        | Homo sapiens           | Democratic Republic of the Congo | 2008 | Ia    | Nakazawa et al         |
| KP849471  | Yambuku_DRC_1985       | Funisciurus anerythrus | Democratic Republic of the Congo | 1985 | Ia    | Nakazawa et al         |
| MN702444  | MN702444               | Homo sapiens           | Central African Republic         | 2017 | Ia    | Selekon et al          |
| MN702445  | MN702445               | Homo sapiens           | Central African Republic         | 2017 | Ia    | Selekon et al          |
| MN702446  | MN702446               | Homo sapiens           | Central African Republic         | 2018 | Ia    | Selekon et al          |
| MN702447  | MN702447               | Homo sapiens           | Central African Republic         | 2018 | Ia    | Selekon et al          |
| MN702448  | MN702448               | Homo sapiens           | Central African Republic         | 2018 | Ia    | Selekon et al          |
| MN702449  | MN702449               | Homo sapiens           | Central African Republic         | 2016 | Ia    | Selekon et al          |
| MN702450  | MN702450               | Homo sapiens           | Central African Republic         | 2016 | Ia    | Selekon et al          |
| MN702451  | MN702451               | Homo sapiens           | Central African Republic         | 2017 | Ia    | Selekon et al          |
| MN702452  | MN702452               | Homo sapiens           | Central African Republic         | 2010 | Ia    | Selekon et al          |
| MN702453  | MN702453               | Homo sapiens           | Central African Republic         | 2001 | Ia    | Selekon et al          |
| MT724770  | MT724770               | Crocidura littoralis   | Democratic Republic of the Congo | 2014 | Ia    | Marien et al           |
| MT724771  | MT724771               | Funisciurus bayonii    | Democratic Republic of the Congo | 2014 | Ia    | Marien et al           |
| MT724772  | MT724772               | Funisciurus anerythrus | Democratic Republic of the Congo | 2014 | Ia    | Marien et al           |
| NC_003310 |                        | Homo sapiens           | Democratic Republic of the Congo | 1996 | Ia    | Senkevich,T.G., et al. |
| OP498046  | BNITM-Gabon1988        | Homo sapiens           | Gabon                            | 1988 | Ia    | Emmerich et al         |
| OQ621553  | MPXV/Sudan/2022/RKI630 | Homo sapiens           | Sudan                            | 2022 | Ia    | Brinkmann,A., et al.   |
| OQ729808  | MPXV/COD/2023/172V     | Homo sapiens           | Democratic Republic of the Congo | 2022 | Ia    | Lee et al              |
| OR943698  | MPXV_CMR_2016_Chimp    | Pan troglodytes        | Cameroon                         | 2016 | Ia    | Brien et al            |
| PP601182  | 23MPX1740C             | Homo sapiens           | Democratic Republic of the Congo | 2023 | Ia    | Vakaniaki et al        |
| PP601183  | 23MPX1766C             | Homo sapiens           | Democratic Republic of the Congo | 2023 | Ia    | Vakaniaki et al        |

| accession | isolate     | Host         | Country                          | year | Clade | Authors         |
|-----------|-------------|--------------|----------------------------------|------|-------|-----------------|
| PP601184  | 23MPX1769C  | Homo sapiens | Democratic Republic of the Congo | 2023 | Ia    | Vakaniaki et al |
| PP601185  | 23MPX1786C  | Homo sapiens | Democratic Republic of the Congo | 2023 | Ia    | Vakaniaki et al |
| PP601186  | 23MPX1793V  | Homo sapiens | Democratic Republic of the Congo | 2023 | Ia    | Vakaniaki et al |
| PP601187  | 23MPX1806V  | Homo sapiens | Democratic Republic of the Congo | 2023 | Ia    | Vakaniaki et al |
| PP601188  | 24MPX0008V  | Homo sapiens | Democratic Republic of the Congo | 2023 | Ia    | Vakaniaki et al |
| PP601189  | 24MPX0009C  | Homo sapiens | Democratic Republic of the Congo | 2023 | Ia    | Vakaniaki et al |
| PP601190  | 24MPX0012C  | Homo sapiens | Democratic Republic of the Congo | 2023 | Ia    | Vakaniaki et al |
| PP601191  | 24MPX0014C  | Homo sapiens | Democratic Republic of the Congo | 2023 | Ia    | Vakaniaki et al |
| PP601192  | 24MPX0018V  | Homo sapiens | Democratic Republic of the Congo | 2024 | Ia    | Vakaniaki et al |
| PP601193  | 24MPX0024C  | Homo sapiens | Democratic Republic of the Congo | 2023 | Ia    | Vakaniaki et al |
| PP601194  | 24MPX0025V  | Homo sapiens | Democratic Republic of the Congo | 2023 | Ia    | Vakaniaki et al |
| PP601195  | 24MPX0026V  | Homo sapiens | Democratic Republic of the Congo | 2023 | Ia    | Vakaniaki et al |
| PP601196  | 24MPX0037V  | Homo sapiens | Democratic Republic of the Congo | 2024 | Ia    | Vakaniaki et al |
| PP601197  | 24MPX0038V  | Homo sapiens | Democratic Republic of the Congo | 2024 | Ia    | Vakaniaki et al |
| PP601198  | 24MPX0041V  | Homo sapiens | Democratic Republic of the Congo | 2024 | Ia    | Vakaniaki et al |
| PP601199  | 24MPX0164V  | Homo sapiens | Democratic Republic of the Congo | 2024 | Ia    | Vakaniaki et al |
| PP601200  | 24MPX0166C  | Homo sapiens | Democratic Republic of the Congo | 2024 | Ia    | Vakaniaki et al |
| PP601201  | 24MPX0168V  | Homo sapiens | Democratic Republic of the Congo | 2024 | Ia    | Vakaniaki et al |
| PP601202  | 24MPX0169C  | Homo sapiens | Democratic Republic of the Congo | 2024 | Ia    | Vakaniaki et al |
| PP601203  | 24MPX0174C  | Homo sapiens | Democratic Republic of the Congo | 2024 | Ia    | Vakaniaki et al |
| PP601204  | 24MPX0175V  | Homo sapiens | Democratic Republic of the Congo | 2024 | Ia    | Vakaniaki et al |
| PP601205  | 24MPX0188V  | Homo sapiens | Democratic Republic of the Congo | 2024 | Ia    | Vakaniaki et al |
| PP601206  | 24MPX0194V  | Homo sapiens | Democratic Republic of the Congo | 2024 | Ia    | Vakaniaki et al |
| PP601207  | 24MPX0198V  | Homo sapiens | Democratic Republic of the Congo | 2024 | Ib    | Vakaniaki et al |
| PP601208  | 24MPX0201V  | Homo sapiens | Democratic Republic of the Congo | 2024 | Ib    | Vakaniaki et al |
| PP601209  | 24MPX0203V  | Homo sapiens | Democratic Republic of the Congo | 2024 | Ib    | Vakaniaki et al |
| PP601210  | 24MPX0205V  | Homo sapiens | Democratic Republic of the Congo | 2024 | Ib    | Vakaniaki et al |
| PP601211  | 24MPX0206V  | Homo sapiens | Democratic Republic of the Congo | 2024 | Ib    | Vakaniaki et al |
| PP601212  | 24MPX0207Or | Homo sapiens | Democratic Republic of the Congo | 2024 | Ib    | Vakaniaki et al |
| PP601213  | 24MPX0209V  | Homo sapiens | Democratic Republic of the Congo | 2024 | Ib    | Vakaniaki et al |

| accession | isolate                        | Host              | Country                          | year | Clade | Authors           |
|-----------|--------------------------------|-------------------|----------------------------------|------|-------|-------------------|
| PP601214  | 24MPX0214V                     | Homo sapiens      | Democratic Republic of the Congo | 2024 | Ib    | Vakaniaki et al   |
| PP601215  | 24MPX0217V                     | Homo sapiens      | Democratic Republic of the Congo | 2024 | Ib    | Vakaniaki et al   |
| PP601216  | 24MPX0220V                     | Homo sapiens      | Democratic Republic of the Congo | 2024 | Ib    | Vakaniaki et al   |
| PP601217  | 24MPX0221V                     | Homo sapiens      | Democratic Republic of the Congo | 2024 | Ib    | Vakaniaki et al   |
| PP601218  | 24MPX0223C                     | Homo sapiens      | Democratic Republic of the Congo | 2023 | Ib    | Vakaniaki et al   |
| PP601219  | 24MPX0224C                     | Homo sapiens      | Democratic Republic of the Congo | 2023 | Ib    | Vakaniaki et al   |
| PP601220  | 24MPX0226V                     | Homo sapiens      | Democratic Republic of the Congo | 2023 | Ib    | Vakaniaki et al   |
| PP601221  | 24MPX0228V                     | Homo sapiens      | Democratic Republic of the Congo | 2023 | Ib    | Vakaniaki et al   |
| PP601222  | 24MPX0230C                     | Homo sapiens      | Democratic Republic of the Congo | 2023 | Ib    | Vakaniaki et al   |
| PP601223  | 24MPX0231V                     | Homo sapiens      | Democratic Republic of the Congo | 2023 | Ib    | Vakaniaki et al   |
| PP601224  | 24MPX0239V                     | Homo sapiens      | Democratic Republic of the Congo | 2024 | Ib    | Vakaniaki et al   |
| PP601225  | 24MPX0240V                     | Homo sapiens      | Democratic Republic of the Congo | 2024 | Ib    | Vakaniaki et al   |
| PP601226  | 24MPX0242V                     | Homo sapiens      | Democratic Republic of the Congo | 2024 | Ib    | Vakaniaki et al   |
| PP601227  | RDC-NKV-GOM-MPOX-004           | Homo sapiens      | Democratic Republic of the Congo | 2023 | Ib    | Vakaniaki et al   |
| PP601228  | RDC-NKV-GOM-MPOX-010           | Homo sapiens      | Democratic Republic of the Congo | 2023 | Ib    | Vakaniaki et al   |
| AY603973  |                                | Cynomolgus monkey | Danemark                         | 1961 | Ila   | Chen N et al      |
| AY741551  | Sierra Leone                   | Homo sapiens      | Sierra Leone                     | 1970 | Ila   | Chen N et al      |
| AY753185  |                                | Cynomolgus monkey | Danemark                         | 1958 | Ila   | Chen N et al      |
| KJ642615  |                                | Homo sapiens      | Nigeria                          | 1978 | Ila   | Nakazawa et al    |
| KJ642616  |                                | Pan troglodytes   | France                           | 1968 | Ila   | Nakazawa et al    |
| KJ642617  |                                | Homo sapiens      | Nigeria                          | 1971 | Ila   | Nakazawa et al    |
| KP849470  | Cote d'Ivoire_1971             | Homo sapiens      | Côte d'Ivoire                    | 1971 | Ila   | Nakazawa et al    |
| MN346690  | MPXV_TNP_2017_North_Bic        | Pan troglodytes   | Côte d'Ivoire                    | 2017 | Ila   | Patrono L.V et al |
| MN346692  | MPXV_TNP_2017_North_Mama       | Pan troglodytes   | Côte d'Ivoire                    | 2017 | Ila   | Patrono L.V et al |
| MN346693  | MPXV_TNP_2017_North_Ponan      | Pan troglodytes   | Côte d'Ivoire                    | 2017 | Ila   | Patrono L.V et al |
| MN346694  | MPXV_TNP_2017_North_Saro       | Pan troglodytes   | Côte d'Ivoire                    | 2017 | Ila   | Patrono L.V et al |
| MN346695  | MPXV_TNP_2017_North_Sidonie    | Pan troglodytes   | Côte d'Ivoire                    | 2017 | Ila   | Patrono L.V et al |
| MN346696  | MPXV_TNP_2017_North_Surprise_1 | Pan troglodytes   | Côte d'Ivoire                    | 2017 | Ila   | Patrono L.V et al |
| MN346697  | MPXV_TNP_2017_North_Surprise_2 | Pan troglodytes   | Côte d'Ivoire                    | 2017 | Ila   | Patrono L.V et al |
| MN346698  | MPXV_TNP_2017_South_Pushkin    | Pan troglodytes   | Côte d'Ivoire                    | 2017 | Ila   | Patrono L.V et al |

| accession | isolate                               | Host                 | Country       | year | Clade | Authors           |
|-----------|---------------------------------------|----------------------|---------------|------|-------|-------------------|
| MN346699  | MPXV_TNP_2017_South_Ravel_1           | Pan troglodytes      | Côte d'Ivoire | 2017 | Ila   | Patrono L.V et al |
| MN346700  | MPXV_TNP_2017_South_Ravel_2           | Pan troglodytes      | Côte d'Ivoire | 2017 | Ila   | Patrono L.V et al |
| MN346701  | MPXV_TNP_2017_South_Woodstock         | Pan troglodytes      | Côte d'Ivoire | 2017 | Ila   | Patrono L.V et al |
| MN346702  | MPXV_TNP_2018_East_Paddy              | Pan troglodytes      | Côte d'Ivoire | 2018 | Ila   | Patrono L.V et al |
| MN346703  | MPXV_TNP_2018_East_Placali            | Pan troglodytes      | Côte d'Ivoire | 2018 | Ila   | Patrono L.V et al |
| MT903346  | MPXV-USA2003_099_Gambian_Rat          | Cricetomys gambianus | USA           | 2003 | Ila   | Mauldin M et al   |
| MT903347  | MPXV-USA2003_099_Dormouse             | Gliridae             | USA           | 2003 | Ila   | Mauldin M et al   |
| MT903348  | MPXV-USA2003_099_Rope_Squirrel        | Funisciurus          | USA           | 2003 | Ila   | Mauldin M et al   |
| MT903339  | MPXV-M3021_Delta                      | Homo sapiens         | Nigeria       | 2018 | Iib   | Mauldin M et al   |
| MT903340  | MPXV-M5312_HM12_Rivers                | Homo sapiens         | Nigeria       | 2018 | Iib   | Mauldin M et al   |
| MT903342  | MPXV-Singapore                        | Homo sapiens         | Singapore     | 2018 | Iib   | Mauldin M et al   |
| MT903343  | MPXV-UK_P1                            | Homo sapiens         | UK            | 2018 | Iib   | Mauldin M et al   |
| NC_063383 | MPXV-M5312_HM12_Rivers                | Homo sapiens         | Nigeria       | 2018 | Iib   | Mauldin M et al   |
| ON622712  | MPXV/UZ_REGA_1/Belgium/2022           | Homo sapiens         | Belgium       | 2022 | Iib   | Vanmechelen et al |
| ON918611  | NICD-SVPL223                          | Homo sapiens         | South-Africa  | 2022 | Iib   | Chan et al        |
| ON927248  | NICD-SVPL232                          | Homo sapiens         | South-Africa  | 2022 | Iib   | Chan et al        |
| OP422631  | MPXV-SEN0021                          | Homo sapiens         | Benin         | 2022 | Iib   | Martin et al      |
| OP422632  | MPXV-SEN0022                          | Homo sapiens         | Benin         | 2022 | Iib   | Martin et al      |
| OP535312  | MPXV_Nigeria_2018_5222                | Homo sapiens         | Nigeria       | 2018 | Iib   | Nmaemeka et al    |
| OP535317  | MPXV_Nigeria_2018_5194                | Homo sapiens         | Nigeria       | 2018 | Iib   | Nmaemeka et al    |
| OP535320  | MPXV_Nigeria_2017_3008                | Homo sapiens         | Nigeria       | 2017 | Iib   | Nmaemeka et al    |
| OP535322  | MPXV_Nigeria_2017_2958                | Homo sapiens         | Nigeria       | 2017 | Iib   | Nmaemeka et al    |
| OP535324  | MPXV_Nigeria_2018_5302                | Homo sapiens         | Nigeria       | 2018 | Iib   | Nmaemeka et al    |
| OP535325  | MPXV_Nigeria_2018_5316                | Homo sapiens         | Nigeria       | 2018 | Iib   | Nmaemeka et al    |
| OP535327  | MPXV_Nigeria_2018_5307                | Homo sapiens         | Nigeria       | 2018 | Iib   | Nmaemeka et al    |
| OP535337  | MPXV_Nigeria_2017_2945                | Homo sapiens         | Nigeria       | 2017 | Iib   | Nmaemeka et al    |
| PP338787  | MPXV/Human/USA/CA-LACPHL-MA00577/2024 | Homo sapiens         | USA           | 2024 | Iib   | McCann et al      |
| PP496048  | hMpxV/Philippines/RITM-002/2022       | Homo sapiens         | Philippines   | 2022 | Iib   | Balingit et al    |

Supplementary table 2 : List of SNP and AA changes within main clades and clusters

| site   | direction | snp  | dimer | apobec | parent codon | parent aa | child codon | child aa | mutation_category | prediction              | homoplasy | Cluster                     | Remarks | gene-OPG |
|--------|-----------|------|-------|--------|--------------|-----------|-------------|----------|-------------------|-------------------------|-----------|-----------------------------|---------|----------|
| 241    | NA        | A->C |       | No     | NA           | NA        | NA          | NA       | intergenic        | NA                      | Yes       | Clade Ia                    |         | NA       |
| 172022 | NA        | A->G |       | No     | NA           | NA        | NA          | NA       | intergenic        | NA                      | No        | Clade Ia                    |         | NA       |
| 178933 | NA        | A->G |       | No     | NA           | NA        | NA          | NA       | intergenic        | NA                      | Yes       | Clade Ia                    |         | NA       |
| 187600 | NA        | G->A | GC    | No     | NA           | NA        | NA          | NA       | intergenic        | NA                      | No        | Clade Ia                    |         | NA       |
| 37379  | reverse   | C->A |       | No     | CGG          | R         | CTG         | L        | nonsynonymous     | moderately radical      | No        | Clade Ia                    |         | OPG056   |
| 127648 | forward   | A->G |       | No     | ACC          | T         | GCC         | A        | nonsynonymous     | moderately conservative | No        | Clade Ia                    |         | OPG149   |
| 140473 | reverse   | T->C |       | No     | AGT          | S         | GGT         | G        | nonsynonymous     | moderately conservative | No        | Clade Ia                    |         | OPG160   |
| 152010 | forward   | G->A | GC    | No     | CGC          | R         | CAC         | H        | nonsynonymous     | conservative            | No        | Clade Ia                    |         | OPG178   |
| 1899   | reverse   | G->A | GA    | Yes    | GTC          | V         | GTT         | V        | synonymous        | NA                      | No        | Clade Ia group I            |         | OPG002   |
| 97172  | forward   | G->A | GG    | No     | GAG          | E         | GAA         | E        | synonymous        | NA                      | No        | Clade Ia group I            |         | OPG117   |
| 107603 | reverse   | G->T |       | No     | GTC          | V         | GTA         | V        | synonymous        | NA                      | No        | Clade Ia group I            |         | OPG125   |
| 120895 | reverse   | C->T | GC    | No     | ATG          | M         | ATA         | I        | nonsynonymous     | conservative            | No        | Clade Ia group I            |         | OPG138   |
| 123589 | reverse   | C->T | GC    | No     | GCT          | A         | ACT         | T        | nonsynonymous     | moderately conservative | No        | Clade Ia group I            |         | OPG144   |
| 146465 | reverse   | A->G |       | No     | TTA          | L         | CTA         | L        | synonymous        | NA                      | No        | Clade Ia group I            |         | OPG170   |
| 188518 | NA        | G->A | GC    | No     | NA           | NA        | NA          | NA       | intergenic        | NA                      | No        | Clade Ia excepted JX874717  |         | NA       |
| 1030   | reverse   | G->A | GA    | Yes    | TCA          | S         | TTA         | L        | nonsynonymous     | moderately radical      | No        | Clade Ia excepted JX874717  |         | OPG001   |
| 16196  | reverse   | G->T |       | No     | CTA          | L         | ATA         | I        | nonsynonymous     | conservative            | No        | Clade Ia excepted JX874717  |         | OPG027   |
| 74384  | forward   | C->T | TC    | Yes    | ATC          | I         | ATT         | I        | synonymous        | NA                      | No        | Clade Ia excepted JX874717  |         | OPG094   |
| 186631 | forward   | G->T |       | No     | GAG          | E         | GAT         | D        | nonsynonymous     | conservative            | No        | Clade Ia excepted JX874717  |         | OPG210   |
| 169500 | NA        | G->A | GT    | No     | NA           | NA        | NA          | NA       | intergenic        | NA                      | Yes       | Clade Ia, groups II and III |         | NA       |
| 169501 | NA        | T->A |       | No     | NA           | NA        | NA          | NA       | intergenic        | NA                      | Yes       | Clade Ia, groups II and III |         | NA       |

| site   | direction | snp  | dimer | apobec | parent codon | parent aa | child codon | child aa | mutation_category | prediction              | homoplasy | Cluster                                | Remarks | gene-OPG |
|--------|-----------|------|-------|--------|--------------|-----------|-------------|----------|-------------------|-------------------------|-----------|----------------------------------------|---------|----------|
| 132943 | NA        | C->T | GC    | No     | NA           | NA        | NA          | NA       | intergenic        | NA                      | No        | Clade Ia, group II                     |         | NA       |
| 1355   | reverse   | G->T |       | No     | CTA          | L         | ATA         | I        | nonsynonymous     | conservative            | No        | Clade Ia, group II                     |         | OPG001   |
| 73148  | forward   | G->A | GA    | Yes    | GAG          | E         | AAG         | K        | nonsynonymous     | moderately conservative | No        | Clade Ia, group II                     |         | OPG093   |
| 137411 | reverse   | G->A | GC    | No     | CGT          | R         | TGT         | C        | nonsynonymous     | radical                 | No        | Clade Ia, group II                     |         | OPG153   |
| 159492 | forward   | T->C |       | No     | TTT          | F         | CTT         | L        | nonsynonymous     | conservative            | No        | Clade Ia, group II                     |         | OPG185   |
| 7732   | forward   | C->A |       | No     | CCA          | P         | ACA         | T        | nonsynonymous     | conservative            | No        | Clade Ia group II, III and novel       |         | OPG019   |
| 8973   | NA        | C->A |       | No     | NA           | NA        | NA          | NA       | intergenic        | NA                      | No        | Clade Ia, group II branch 1            |         | NA       |
| 20627  | reverse   | G->A | GA    | Yes    | TCC          | S         | TTC         | F        | nonsynonymous     | radical                 | No        | Clade Ia, group II branch 1            |         | OPG036   |
| 58283  | reverse   | A->G |       | No     | GTT          | V         | GTC         | V        | synonymous        | NA                      | No        | Clade Ia, group II branch 1            |         | OPG077   |
| 83797  | forward   | C->T | GC    | No     | AGC          | S         | AGT         | S        | synonymous        | NA                      | No        | Clade Ia, group II branch 1            |         | OPG105   |
| 97065  | forward   | C->T | GC    | No     | CAT          | H         | TAT         | Y        | nonsynonymous     | moderately conservative | No        | Clade Ia, group II branch 1            |         | OPG117   |
| 143163 | forward   | C->T | CC    | No     | GCC          | A         | GCT         | A        | synonymous        | NA                      | No        | Clade Ia, group II branch 1            |         | OPG164   |
| 149978 | forward   | G->A | GT    | No     | ATG          | M         | ATA         | I        | nonsynonymous     | conservative            | Yes       | Clade Ia, group II branch 1            |         | OPG176   |
| 620    | NA        | A->G |       | No     | NA           | NA        | NA          | NA       | intergenic        | NA                      | Yes       | Clade Ia, group II branch2 to KJ642613 |         | NA       |
| 7445   | NA        | G->A | GT    | No     | NA           | NA        | NA          | NA       | intergenic        | NA                      | No        | Clade Ia, group II branch2 to KJ642613 |         | NA       |
| 8224   | NA        | C->T | GC    | No     | NA           | NA        | NA          | NA       | intergenic        | NA                      | Yes       | Clade Ia, group II branch2 to KJ642613 |         | NA       |
| 13359  | NA        | G->A | GT    | No     | NA           | NA        | NA          | NA       | intergenic        | NA                      | No        | Clade Ia, group II branch2 to KJ642613 |         | NA       |
| 33659  | NA        | C->T | GC    | No     | NA           | NA        | NA          | NA       | intergenic        | NA                      | No        | Clade Ia, group II branch2 to KJ642613 |         | NA       |
| 135781 | NA        | G->A | GC    | No     | NA           | NA        | NA          | NA       | intergenic        | NA                      | Yes       | Clade Ia, group II branch2 to KJ642613 |         | NA       |
| 178921 | NA        | T->A |       | No     | NA           | NA        | NA          | NA       | intergenic        | NA                      | Yes       | Clade Ia, group II branch2 to KJ642613 |         | NA       |

| site   | direction | snp  | dimer | apobec | parent codon | parent aa | child codon | child aa | mutation_category | prediction              | homoplasy | Cluster                                          | Remarks | gene-OPG |
|--------|-----------|------|-------|--------|--------------|-----------|-------------|----------|-------------------|-------------------------|-----------|--------------------------------------------------|---------|----------|
| 60686  | reverse   | G->A | GA    | Yes    | CTC          | L         | CTT         | L        | synonymous        | NA                      | No        | Clade Ia, group II branch2 to KJ642613           |         | OPG080   |
| 65424  | forward   | G->A | GC    | No     | CGC          | R         | CAC         | H        | nonsynonymous     | conservative            | No        | Clade Ia, group II branch2 to KJ642613           |         | OPG084   |
| 66885  | reverse   | C->T | AC    | No     | TGT          | C         | TAT         | Y        | nonsynonymous     | radical                 | No        | Clade Ia, group II branch2 to KJ642613           |         | OPG085   |
| 68972  | forward   | G->T |       | No     | ACG          | T         | ACT         | T        | synonymous        | NA                      | No        | Clade Ia, group II branch2 to KJ642613           |         | OPG087   |
| 81642  | forward   | C->T | AC    | No     | ACG          | T         | ATG         | M        | nonsynonymous     | moderately conservative | No        | Clade Ia, group II branch2 to KJ642613           |         | OPG105   |
| 113802 | reverse   | C->T | TC    | Yes    | GAG          | E         | AAG         | K        | nonsynonymous     | moderately conservative | No        | Clade Ia, group II branch2 to KJ642613           |         | OPG133   |
| 146163 | reverse   | G->T |       | No     | TCC          | S         | TCA         | S        | synonymous        | NA                      | No        | Clade Ia, group II branch2 to KJ642613           |         | OPG170   |
| 12677  | reverse   | G->A | GC    | No     | CTC          | L         | TTC         | F        | nonsynonymous     | conservative            | No        | Clade Ia, group II branch 2                      |         | OPG023   |
| 37094  | NA        | G->A | GG    | No     | NA           | NA        | NA          | NA       | intergenic        | NA                      | No        | Clade Ia, group II to branch 2 excepted KJ642613 |         | NA       |
| 156635 | NA        | C->T | AC    | No     | NA           | NA        | NA          | NA       | intergenic        | NA                      | Yes       | Clade Ia, group II to branch 2 excepted KJ642613 |         | NA       |
| 943    | reverse   | G->A | GT    | No     | ACG          | T         | ATG         | M        | nonsynonymous     | moderately conservative | No        | Clade Ia, group II to branch 2 excepted KJ642613 |         | OPG001   |
| 3344   | reverse   | G->T |       | No     | GCC          | A         | GCA         | A        | synonymous        | NA                      | No        | Clade Ia, group II to branch 2 excepted KJ642613 |         | OPG003   |
| 189286 | forward   | G->A | GC    | No     | TGC          | C         | TAC         | Y        | nonsynonymous     | radical                 | Yes       | Clade Ia, group II to branch 2 excepted KJ642613 |         | OPG005   |
| 11620  | reverse   | G->A | GT    | No     | ACA          | T         | ATA         | I        | nonsynonymous     | moderately conservative | No        | Clade Ia, group II to branch 2 excepted KJ642613 |         | OPG023   |
| 33242  | reverse   | G->A | GT    | No     | CTT          | L         | TTT         | F        | nonsynonymous     | conservative            | No        | Clade Ia, group II to branch 2 excepted KJ642613 |         | OPG050   |

| site   | direction | snp  | dimer | apobec | parent codon | parent aa | child codon | child aa | mutation_category | prediction              | homoplasy | Cluster                                          | Remarks | gene-OPG |
|--------|-----------|------|-------|--------|--------------|-----------|-------------|----------|-------------------|-------------------------|-----------|--------------------------------------------------|---------|----------|
| 39257  | reverse   | G->T |       | No     | ACC          | T         | AAC         | N        | nonsynonymous     | moderately conservative | No        | Clade Ia, group II to branch 2 excepted KJ642613 |         | OPG057   |
| 60179  | reverse   | T->C |       | No     | TCA          | S         | TCG         | S        | synonymous        | NA                      | No        | Clade Ia, group II to branch 2 excepted KJ642613 |         | OPG080   |
| 63257  | reverse   | G->A | GT    | No     | GAC          | D         | GAT         | D        | synonymous        | NA                      | No        | Clade Ia, group II to branch 2 excepted KJ642613 |         | OPG082   |
| 64695  | reverse   | G->A | GA    | Yes    | ATC          | I         | ATT         | I        | synonymous        | NA                      | Yes       | Clade Ia, group II to branch 2 excepted KJ642613 |         | OPG083   |
| 89780  | forward   | C->T | GC    | No     | AGC          | S         | AGT         | S        | synonymous        | NA                      | No        | Clade Ia, group II to branch 2 excepted KJ642613 |         | OPG110   |
| 102930 | forward   | C->G |       | No     | AAC          | N         | AAG         | K        | nonsynonymous     | moderately conservative | No        | Clade Ia, group II to branch 2 excepted KJ642613 |         | OPG122   |
| 103393 | reverse   | T->C |       | No     | TCA          | S         | TCG         | S        | synonymous        | NA                      | No        | Clade Ia, group II to branch 2 excepted KJ642613 |         | OPG123   |
| 137852 | reverse   | G->T |       | No     | GCC          | A         | GCA         | A        | synonymous        | NA                      | No        | Clade Ia, group II to branch 2 excepted KJ642613 |         | OPG154   |
| 138900 | reverse   | C->T | AC    | No     | CGT          | R         | CAT         | H        | nonsynonymous     | conservative            | No        | Clade Ia, group II to branch 2 excepted KJ642613 |         | OPG156   |
| 180253 | forward   | G->T |       | No     | TGA          | *         | TTA         | L        | nonsynonymous     | NA                      | No        | Clade Ia, group II to branch 2 excepted KJ642613 |         | OPG208   |
| 180733 | forward   | G->A | GT    | No     | GTA          | V         | ATA         | I        | nonsynonymous     | conservative            | No        | Clade Ia, group II to branch 2 excepted KJ642613 |         | OPG209   |
| 32540  | reverse   | T->C |       | No     | GAC          | D         | GGC         | G        | nonsynonymous     | moderately conservative | No        | Clade Ia, group II, branch 2 cluster 1           |         | OPG049   |
| 162920 | forward   | A->C |       | No     | CTA          | L         | CTC         | L        | synonymous        | NA                      | No        | Clade Ia, group II, branch 2 cluster 2           |         | OPG188   |

| site   | direction | snp  | dimer | apobec | parent codon | parent aa | child codon | child aa | mutation_category | prediction              | homoplasy | Cluster                                             | Remarks | gene-OPG |
|--------|-----------|------|-------|--------|--------------|-----------|-------------|----------|-------------------|-------------------------|-----------|-----------------------------------------------------|---------|----------|
| 148732 | reverse   | T->G |       | No     | TAA          | *         | TAC         | Y        | nonsynonymous     | NA                      | Yes       | Clade Ia, group II, branch 2 , all except cluster 1 |         | OPG174   |
| 3734   | reverse   | G->A | GA    | Yes    | ATC          | I         | ATT         | I        | synonymous        | NA                      | No        | Clade Ia, group II, branch 2 cluster 3              |         | OPG003   |
| 21248  | reverse   | G->A | GC    | No     | GGC          | G         | GGT         | G        | synonymous        | NA                      | No        | Clade Ia, group II, branch 2 cluster 3              |         | OPG037   |
| 79586  | forward   | T->C |       | No     | CTA          | L         | CCA         | P        | nonsynonymous     | moderately conservative | No        | Clade Ia, group II, branch 2 cluster 3              |         | OPG102   |
| 80959  | reverse   | T->C |       | No     | TCA          | S         | TCG         | S        | synonymous        | NA                      | No        | Clade Ia, group II, branch 2 cluster 3              |         | OPG104   |
| 185841 | forward   | A->G |       | No     | AAC          | N         | AGC         | S        | nonsynonymous     | conservative            | No        | Clade Ia, group II, branch 2 cluster 3              |         | OPG210   |
| 171    | NA        | A->C |       | No     | NA           | NA        | NA          | NA       | intergenic        | NA                      | Yes       | Clade Ia, group II, branch 2 cluster 3 to 6         |         | NA       |
| 26366  | reverse   | C->T | TC    | Yes    | CGA          | R         | CAA         | Q        | nonsynonymous     | conservative            | No        | Clade Ia, group II, branch 2 cluster 4              |         | OPG042   |
| 54747  | forward   | G->T |       | No     | ATG          | M         | ATT         | I        | nonsynonymous     | conservative            | No        | Clade Ia, group II, branch 2 cluster 4              |         | OPG072   |
| 64695  | reverse   | A->G |       | No     | ATT          | I         | ATC         | I        | synonymous        | NA                      | Yes       | Clade Ia, group II, branch 2 cluster 4              |         | OPG083   |
| 91902  | forward   | G->A | GT    | No     | CGT          | R         | CAT         | H        | nonsynonymous     | conservative            | No        | Clade Ia, group II, branch 2 cluster 4              |         | OPG113   |
| 126093 | forward   | C->T | GC    | No     | CAT          | H         | TAT         | Y        | nonsynonymous     | moderately conservative | No        | Clade Ia, group II, branch 2 cluster 4              |         | OPG148   |
| 129253 | forward   | G->T |       | No     | GCA          | A         | TCA         | S        | nonsynonymous     | moderately conservative | No        | Clade Ia, group II, branch 2 cluster 4              |         | OPG151   |
| 149559 | forward   | T->G |       | No     | GTT          | V         | GGT         | G        | nonsynonymous     | moderately radical      | No        | Clade Ia, group II, branch 2 cluster 4              |         | OPG175   |
| 151601 | forward   | G->A | GT    | No     | GTG          | V         | ATG         | M        | nonsynonymous     | conservative            | No        | Clade Ia, group II, branch 2 cluster 4              |         | OPG178   |
| 145464 | NA        | T->C |       | No     | NA           | NA        | NA          | NA       | intergenic        | NA                      | No        | Clade Ia, group II, branch 2 cluster 5              |         | NA       |
| 35932  | reverse   | C->T | GC    | No     | GCA          | A         | ACA         | T        | nonsynonymous     | moderately conservative | No        | Clade Ia, group II, branch 2 cluster 5              |         | OPG054   |
| 42693  | reverse   | G->C |       | No     | ACA          | T         | AGA         | R        | nonsynonymous     | moderately conservative | No        | Clade Ia, group II, branch 2 cluster 5              |         | OPG063   |

| site   | direction | snp  | dimer | apobec | parent codon | parent aa | child codon | child aa | mutation_category | prediction                 | homoplasy | Cluster                                        | Remarks | gene-OPG |
|--------|-----------|------|-------|--------|--------------|-----------|-------------|----------|-------------------|----------------------------|-----------|------------------------------------------------|---------|----------|
| 178923 | NA        | A->G |       | No     | NA           | NA        | NA          | NA       | intergenic        | NA                         | Yes       | Clade Ia, group II,<br>branch 2 cluster 6      |         | NA       |
| 159653 | forward   | A->T |       | No     | TTA          | L         | TTT         | F        | nonsynonymous     | conservative               | Yes       | Clade Ia, group II,<br>branch 2 cluster 6      |         | OPG185   |
| 826    | NA        | C->T | TC    | Yes    | NA           | NA        | NA          | NA       | intergenic        | NA                         | No        | Clade Ia, group III                            |         | NA       |
| 157592 | NA        | C->A |       | No     | NA           | NA        | NA          | NA       | intergenic        | NA                         | No        | Clade Ia, group III                            |         | NA       |
| 168929 | NA        | G->T |       | No     | NA           | NA        | NA          | NA       | intergenic        | NA                         | Yes       | Clade Ia, group III                            |         | NA       |
| 178923 | NA        | A->G |       | No     | NA           | NA        | NA          | NA       | intergenic        | NA                         | Yes       | Clade Ia, group III                            |         | NA       |
| 118195 | reverse   | C->T | AC    | No     | TAG          | *         | TAA         | *        | synonymous        | NA                         | No        | Clade Ia, group III                            |         | OPG136   |
| 150201 | forward   | A->T |       | No     | AAA          | K         | TAA         | *        | nonsense          | NA                         | Yes       | Clade Ia, group III                            |         | OPG176   |
| 149978 | forward   | G->A | GT    | No     | ATG          | M         | ATA         | I        | nonsynonymous     | conservative               | Yes       | Clade Ia, group III                            |         | OPG176   |
| 154113 | forward   | G->A | GT    | No     | GTT          | V         | ATT         | I        | nonsynonymous     | conservative               | No        | Clade Ia, group III                            |         | OPG180   |
| 176367 | forward   | C->T | AC    | No     | ACA          | T         | ATA         | I        | nonsynonymous     | moderately<br>conservative | No        | Clade Ia, group III                            |         | OPG205   |
| 177394 | forward   | C->T | TC    | Yes    | GTC          | V         | GTT         | V        | synonymous        | NA                         | No        | Clade Ia, group III                            |         | OPG205   |
| 186579 | forward   | G->T |       | No     | AGA          | R         | ATA         | I        | nonsynonymous     | moderately<br>conservative | No        | Clade Ia, group III                            |         | OPG210   |
| 168929 | NA        | G->T |       | No     | NA           | NA        | NA          | NA       | intergenic        | NA                         | Yes       | Clade Ia, novel cluster<br>closed to group III |         | NA       |
| 23448  | reverse   | A->G |       | No     | TAC          | Y         | CAC         | H        | nonsynonymous     | moderately<br>conservative | No        | Clade Ia, novel cluster<br>closed to group III |         | OPG039   |
| 48566  | forward   | G->A | GC    | No     | GCA          | A         | ACA         | T        | nonsynonymous     | moderately<br>conservative | Yes       | Clade Ia, novel cluster<br>closed to group III |         | OPG068   |
| 59282  | reverse   | G->A | GT    | No     | CAC          | H         | CAT         | H        | synonymous        | NA                         | No        | Clade Ia, novel cluster<br>closed to group III |         | OPG079   |
| 65664  | forward   | C->T | AC    | No     | ACG          | T         | ATG         | M        | nonsynonymous     | moderately<br>conservative | No        | Clade Ia, novel cluster<br>closed to group III |         | OPG084   |
| 86071  | forward   | G->A | GC    | No     | ACG          | T         | ACA         | T        | synonymous        | NA                         | No        | Clade Ia, novel cluster<br>closed to group III |         | OPG107   |
| 113943 | reverse   | C->T | GC    | No     | GCC          | A         | ACC         | T        | nonsynonymous     | moderately<br>conservative | No        | Clade Ia, novel cluster<br>closed to group III |         | OPG133   |
| 140728 | reverse   | G->A | GA    | Yes    | CAT          | H         | TAT         | Y        | nonsynonymous     | moderately<br>conservative | No        | Clade Ia, novel cluster<br>closed to group III |         | OPG160   |
| 147889 | forward   | A->C |       | No     | AAT          | N         | ACT         | T        | nonsynonymous     | moderately<br>conservative | No        | Clade Ia, novel cluster<br>closed to group III |         | OPG172   |

| site   | direction | snp  | dimer | apobec | parent codon | parent aa | child codon | child aa | mutation_category | prediction              | homoplasy | Cluster                                     | Remarks | gene-OPG |
|--------|-----------|------|-------|--------|--------------|-----------|-------------|----------|-------------------|-------------------------|-----------|---------------------------------------------|---------|----------|
| 177066 | forward   | C->T | GC    | No     | GCT          | A         | GTT         | V        | nonsynonymous     | moderately conservative | No        | Clade Ia, novel cluster closed to group III |         | OPG205   |
| 185470 | forward   | G->A | GA    | Yes    | GTG          | V         | GTA         | V        | synonymous        | NA                      | No        | Clade Ia, novel cluster closed to group III |         | OPG210   |
| 19049  | NA        | T->A |       | No     | NA           | NA        | NA          | NA       | intergenic        | NA                      | No        | Clade Ia, group IV                          |         | NA       |
| 89540  | NA        | C->T | GC    | No     | NA           | NA        | NA          | NA       | intergenic        | NA                      | No        | Clade Ia, group IV                          |         | NA       |
| 148301 | NA        | G->A | GG    | No     | NA           | NA        | NA          | NA       | intergenic        | NA                      | No        | Clade Ia, group IV                          |         | NA       |
| 42209  | forward   | G->A | GC    | No     | ATG          | M         | ATA         | I        | nonsynonymous     | conservative            | No        | Clade Ia, group IV                          |         | OPG062   |
| 56842  | reverse   | C->A |       | No     | GTT          | V         | TTT         | F        | nonsynonymous     | conservative            | No        | Clade Ia, group IV                          |         | OPG074   |
| 58670  | reverse   | G->T |       | No     | ACC          | T         | ACA         | T        | synonymous        | NA                      | No        | Clade Ia, group IV                          |         | OPG078   |
| 59951  | reverse   | C->T | GC    | No     | GTG          | V         | GTA         | V        | synonymous        | NA                      | No        | Clade Ia, group IV                          |         | OPG080   |
| 84253  | forward   | C->A |       | No     | CCC          | P         | CCA         | P        | synonymous        | NA                      | No        | Clade Ia, group IV                          |         | OPG105   |
| 111818 | reverse   | C->A |       | No     | CCG          | P         | CCT         | P        | synonymous        | NA                      | No        | Clade Ia, group IV                          |         | OPG130   |
| 124688 | forward   | G->A | GC    | No     | CGC          | R         | CAC         | H        | nonsynonymous     | conservative            | Yes       | Clade Ia, group IV                          |         | OPG145   |
| 136139 | reverse   | A->G |       | No     | TAG          | *         | CAG         | Q        | nonsynonymous     | NA                      | No        | Clade Ia, group IV                          |         | OPG153   |
| 147805 | forward   | G->A | GC    | No     | TGC          | C         | TAC         | Y        | nonsynonymous     | radical                 | No        | Clade Ia, group IV                          |         | OPG172   |
| 164819 | forward   | A->G |       | No     | ATA          | I         | ATG         | M        | nonsynonymous     | conservative            | No        | Clade Ia, group IV                          |         | OPG189   |
| 186992 | forward   | G->A | GA    | Yes    | GAA          | E         | AAA         | K        | nonsynonymous     | moderately conservative | Yes       | Clade Ia, group IV                          |         | OPG210   |
| 25699  | NA        | G->T |       | No     | NA           | NA        | NA          | NA       | intergenic        | NA                      | No        | Clade Ia, group V (branch to JX878417)      |         | NA       |
| 33749  | NA        | G->A | GC    | No     | NA           | NA        | NA          | NA       | intergenic        | NA                      | Yes       | Clade Ia, group V (branch to JX878417)      |         | NA       |
| 49955  | NA        | C->T | GC    | No     | NA           | NA        | NA          | NA       | intergenic        | NA                      | No        | Clade Ia, group V (branch to JX878417)      |         | NA       |
| 158859 | NA        | C->T | AC    | No     | NA           | NA        | NA          | NA       | intergenic        | NA                      | No        | Clade Ia, group V (branch to JX878417)      |         | NA       |
| 169483 | NA        | C->T | AC    | No     | NA           | NA        | NA          | NA       | intergenic        | NA                      | Yes       | Clade Ia, group V (branch to JX878417)      |         | NA       |
| 178923 | NA        | A->G |       | No     | NA           | NA        | NA          | NA       | intergenic        | NA                      | Yes       | Clade Ia, group V (branch to JX878417)      |         | NA       |
| 178986 | NA        | C->T | TC    | Yes    | NA           | NA        | NA          | NA       | intergenic        | NA                      | No        | Clade Ia, group V (branch to JX878417)      |         | NA       |

| site   | direction | snp  | dimer | apobec | parent codon | parent aa | child codon | child aa | mutation_category | prediction              | homoplasy | Cluster                                   | Remarks | gene-OPG |
|--------|-----------|------|-------|--------|--------------|-----------|-------------|----------|-------------------|-------------------------|-----------|-------------------------------------------|---------|----------|
| 180434 | NA        | T->A |       | No     | NA           | NA        | NA          | NA       | intergenic        | NA                      | No        | Clade Ia, group V<br>(branch to JX878417) |         | NA       |
| 189289 | forward   | G->A | GC    | No     | TGC          | C         | TAC         | Y        | nonsynonymous     | radical                 | No        | Clade Ia, group V<br>(branch to JX878417) |         | OPG005   |
| 16202  | reverse   | G->A | GT    | No     | CAC          | H         | TAC         | Y        | nonsynonymous     | moderately conservative | No        | Clade Ia, group V<br>(branch to JX878417) |         | OPG027   |
| 19836  | reverse   | A->C |       | No     | TAA          | *         | GAA         | E        | nonsynonymous     | NA                      | No        | Clade Ia, group V<br>(branch to JX878417) |         | OPG034   |
| 19432  | reverse   | G->A | GC    | No     | GGC          | G         | GGT         | G        | synonymous        | NA                      | No        | Clade Ia, group V<br>(branch to JX878417) |         | OPG034   |
| 31836  | reverse   | T->C |       | No     | ATA          | I         | GTA         | V        | nonsynonymous     | conservative            | No        | Clade Ia, group V<br>(branch to JX878417) |         | OPG048   |
| 41758  | reverse   | C->T | GC    | No     | CCG          | P         | CCA         | P        | synonymous        | NA                      | No        | Clade Ia, group V<br>(branch to JX878417) |         | OPG061   |
| 49318  | forward   | G->T |       | No     | ATG          | M         | ATT         | I        | nonsynonymous     | conservative            | No        | Clade Ia, group V<br>(branch to JX878417) |         | OPG068   |
| 51487  | reverse   | A->G |       | No     | TTC          | F         | TCC         | S        | nonsynonymous     | radical                 | No        | Clade Ia, group V<br>(branch to JX878417) |         | OPG071   |
| 62009  | reverse   | G->A | GC    | No     | TGC          | C         | TGT         | C        | synonymous        | NA                      | No        | Clade Ia, group V<br>(branch to JX878417) |         | OPG080   |
| 62183  | reverse   | A->G |       | No     | AGT          | S         | AGC         | S        | synonymous        | NA                      | No        | Clade Ia, group V<br>(branch to JX878417) |         | OPG081   |
| 72640  | reverse   | T->C |       | No     | ATC          | I         | GTC         | V        | nonsynonymous     | conservative            | No        | Clade Ia, group V<br>(branch to JX878417) |         | OPG092   |
| 73232  | forward   | T->G |       | No     | TCT          | S         | GCT         | A        | nonsynonymous     | moderately conservative | No        | Clade Ia, group V<br>(branch to JX878417) |         | OPG093   |
| 75313  | forward   | C->T | GC    | No     | GCG          | A         | GTG         | V        | nonsynonymous     | moderately conservative | No        | Clade Ia, group V<br>(branch to JX878417) |         | OPG095   |
| 89371  | reverse   | G->T |       | No     | CGT          | R         | AGT         | S        | nonsynonymous     | moderately radical      | No        | Clade Ia, group V<br>(branch to JX878417) |         | OPG109   |
| 93791  | forward   | C->T | GC    | No     | CGT          | R         | TGT         | C        | nonsynonymous     | radical                 | No        | Clade Ia, group V<br>(branch to JX878417) |         | OPG113   |
| 94019  | forward   | G->A | GC    | No     | GCC          | A         | ACC         | T        | nonsynonymous     | moderately conservative | Yes       | Clade Ia, group V<br>(branch to JX878417) |         | OPG113   |
| 112442 | reverse   | C->A |       | No     | ACG          | T         | ACT         | T        | synonymous        | NA                      | No        | Clade Ia, group V<br>(branch to JX878417) |         | OPG132   |

| site   | direction | snp  | dimer | apobec | parent codon | parent aa | child codon | child aa | mutation_category | prediction              | homoplasy | Cluster                                   | Remarks | gene-OPG |
|--------|-----------|------|-------|--------|--------------|-----------|-------------|----------|-------------------|-------------------------|-----------|-------------------------------------------|---------|----------|
| 119429 | reverse   | G->A | GT    | No     | ACT          | T         | ATT         | I        | nonsynonymous     | moderately conservative | No        | Clade Ia, group V<br>(branch to JX878417) |         | OPG136   |
| 124688 | forward   | G->A | GC    | No     | CGC          | R         | CAC         | H        | nonsynonymous     | conservative            | Yes       | Clade Ia, group V<br>(branch to JX878417) |         | OPG145   |
| 144147 | forward   | A->G |       | No     | GTA          | V         | GTG         | V        | synonymous        | NA                      | No        | Clade Ia, group V<br>(branch to JX878417) |         | OPG165   |
| 148082 | forward   | C->T | CC    | No     | CCG          | P         | CTG         | L        | nonsynonymous     | moderately conservative | No        | Clade Ia, group V<br>(branch to JX878417) |         | OPG173   |
| 150182 | forward   | C->A |       | No     | ACC          | T         | ACA         | T        | synonymous        | NA                      | No        | Clade Ia, group V<br>(branch to JX878417) |         | OPG176   |
| 153019 | forward   | T->C |       | No     | GTA          | V         | GCA         | A        | nonsynonymous     | moderately conservative | No        | Clade Ia, group V<br>(branch to JX878417) |         | OPG180   |
| 168022 | forward   | C->T | GC    | No     | TGC          | C         | TGT         | C        | synonymous        | NA                      | No        | Clade Ia, group V<br>(branch to JX878417) |         | OPG193   |
| 175035 | forward   | C->T | AC    | No     | CGT          | R         | TGT         | C        | nonsynonymous     | radical                 | No        | Clade Ia, group V<br>(branch to JX878417) |         | OPG204   |
| 180920 | forward   | G->A | GC    | No     | AGC          | S         | AAC         | N        | nonsynonymous     | conservative            | Yes       | Clade Ia, group V<br>(branch to JX878417) |         | OPG209   |
| 7024   | NA        | C->T | AC    | No     | NA           | NA        | NA          | NA       | intergenic        | NA                      | No        | Clade Ib                                  |         | NA       |
| 8042   | NA        | C->T | GC    | No     | NA           | NA        | NA          | NA       | intergenic        | NA                      | No        | Clade Ib                                  |         | NA       |
| 8743   | NA        | C->T | GC    | No     | NA           | NA        | NA          | NA       | intergenic        | NA                      | No        | Clade Ib                                  |         | NA       |
| 16560  | NA        | C->T | CC    | No     | NA           | NA        | NA          | NA       | intergenic        | NA                      | No        | Clade Ib                                  |         | NA       |
| 18958  | NA        | C->T | GC    | No     | NA           | NA        | NA          | NA       | intergenic        | NA                      | No        | Clade Ib                                  |         | NA       |
| 19038  | NA        | A->C |       | No     | NA           | NA        | NA          | NA       | intergenic        | NA                      | No        | Clade Ib                                  |         | NA       |
| 19128  | NA        | T->A |       | No     | NA           | NA        | NA          | NA       | intergenic        | NA                      | No        | Clade Ib                                  |         | NA       |
| 20453  | NA        | T->C |       | No     | NA           | NA        | NA          | NA       | intergenic        | NA                      | No        | Clade Ib                                  |         | NA       |
| 20455  | NA        | C->A |       | No     | NA           | NA        | NA          | NA       | intergenic        | NA                      | No        | Clade Ib                                  |         | NA       |
| 20456  | NA        | A->T |       | No     | NA           | NA        | NA          | NA       | intergenic        | NA                      | No        | Clade Ib                                  |         | NA       |
| 25635  | NA        | C->A |       | No     | NA           | NA        | NA          | NA       | intergenic        | NA                      | No        | Clade Ib                                  |         | NA       |
| 47658  | NA        | G->A | GT    | No     | NA           | NA        | NA          | NA       | intergenic        | NA                      | Yes       | Clade Ib                                  |         | NA       |
| 81085  | NA        | C->T | TC    | Yes    | NA           | NA        | NA          | NA       | intergenic        | NA                      | No        | Clade Ib                                  |         | NA       |
| 133915 | NA        | G->A | GT    | No     | NA           | NA        | NA          | NA       | intergenic        | NA                      | No        | Clade Ib                                  |         | NA       |
| 133936 | NA        | A->G |       | No     | NA           | NA        | NA          | NA       | intergenic        | NA                      | Yes       | Clade Ib                                  |         | NA       |

| site   | direction | snp  | dimer | apobec | parent codon | parent aa | child codon | child aa | mutation_category | prediction              | homoplasy | Cluster  | Remarks | gene-OPG |
|--------|-----------|------|-------|--------|--------------|-----------|-------------|----------|-------------------|-------------------------|-----------|----------|---------|----------|
| 135422 | NA        | G->A | GT    | No     | NA           | NA        | NA          | NA       | intergenic        | NA                      | No        | Clade Ib |         | NA       |
| 156500 | NA        | C->T | GC    | No     | NA           | NA        | NA          | NA       | intergenic        | NA                      | Yes       | Clade Ib |         | NA       |
| 156635 | NA        | C->T | AC    | No     | NA           | NA        | NA          | NA       | intergenic        | NA                      | Yes       | Clade Ib |         | NA       |
| 158612 | NA        | C->T | AC    | No     | NA           | NA        | NA          | NA       | intergenic        | NA                      | No        | Clade Ib |         | NA       |
| 160116 | NA        | G->T |       | No     | NA           | NA        | NA          | NA       | intergenic        | NA                      | No        | Clade Ib |         | NA       |
| 165027 | NA        | C->T | GC    | No     | NA           | NA        | NA          | NA       | intergenic        | NA                      | Yes       | Clade Ib |         | NA       |
| 170928 | NA        | C->A |       | No     | NA           | NA        | NA          | NA       | intergenic        | NA                      | No        | Clade Ib |         | NA       |
| 178130 | NA        | G->T |       | No     | NA           | NA        | NA          | NA       | intergenic        | NA                      | No        | Clade Ib |         | NA       |
| 3181   | reverse   | G->A | GT    | No     | CCA          | P         | TCA         | S        | nonsynonymous     | moderately conservative | No        | Clade Ib |         | OPG003   |
| 3003   | reverse   | G->A | GG    | No     | CCA          | P         | CTA         | L        | nonsynonymous     | moderately conservative | No        | Clade Ib |         | OPG003   |
| 5366   | reverse   | C->T | GC    | No     | GCA          | A         | ACA         | T        | nonsynonymous     | moderately conservative | No        | Clade Ib |         | OPG015   |
| 5968   | reverse   | A->G |       | No     | ATA          | I         | ACA         | T        | nonsynonymous     | moderately conservative | No        | Clade Ib |         | OPG015   |
| 7889   | forward   | G->T |       | No     | AGG          | R         | ATG         | M        | nonsynonymous     | moderately conservative | No        | Clade Ib |         | OPG019   |
| 12625  | reverse   | G->A | GC    | No     | GCT          | A         | GTT         | V        | nonsynonymous     | moderately conservative | No        | Clade Ib |         | OPG023   |
| 14498  | reverse   | G->T |       | No     | CCA          | P         | ACA         | T        | nonsynonymous     | conservative            | No        | Clade Ib |         | OPG025   |
| 20269  | reverse   | G->A | GA    | Yes    | ATC          | I         | ATT         | I        | synonymous        | NA                      | No        | Clade Ib |         | OPG035   |
| 21460  | reverse   | G->T |       | No     | CTA          | L         | ATA         | I        | nonsynonymous     | conservative            | No        | Clade Ib |         | OPG037   |
| 23021  | reverse   | C->T | AC    | No     | TGG          | W         | TGA         | *        | nonsense          | NA                      | No        | Clade Ib |         | OPG038   |
| 27032  | reverse   | C->T | GC    | No     | TGC          | C         | TAC         | Y        | nonsynonymous     | radical                 | No        | Clade Ib |         | OPG042   |
| 28658  | reverse   | G->A | GT    | No     | CTC          | L         | TTC         | F        | nonsynonymous     | conservative            | No        | Clade Ib |         | OPG045   |
| 29788  | reverse   | T->C |       | No     | AAT          | N         | AGT         | S        | nonsynonymous     | conservative            | No        | Clade Ib |         | OPG047   |
| 33551  | reverse   | C->T | TC    | Yes    | CGA          | R         | CAA         | Q        | nonsynonymous     | conservative            | No        | Clade Ib |         | OPG051   |
| 43441  | reverse   | T->C |       | No     | ATT          | I         | GTT         | V        | nonsynonymous     | conservative            | No        | Clade Ib |         | OPG063   |
| 43996  | reverse   | A->G |       | No     | TGT          | C         | TGC         | C        | synonymous        | NA                      | No        | Clade Ib |         | OPG064   |
| 44254  | reverse   | C->T | AC    | No     | ACG          | T         | ACA         | T        | synonymous        | NA                      | No        | Clade Ib |         | OPG064   |

| site   | direction | snp  | dimer | apobec | parent codon | parent aa | child codon | child aa | mutation_category | prediction              | homoplasy | Cluster  | Remarks | gene-OPG |
|--------|-----------|------|-------|--------|--------------|-----------|-------------|----------|-------------------|-------------------------|-----------|----------|---------|----------|
| 48612  | forward   | A->T |       | No     | AAT          | N         | ATT         | I        | nonsynonymous     | moderately radical      | No        | Clade Ib |         | OPG068   |
| 48786  | forward   | G->T |       | No     | AGA          | R         | ATA         | I        | nonsynonymous     | moderately conservative | No        | Clade Ib |         | OPG068   |
| 49030  | forward   | C->A |       | No     | TCC          | S         | TCA         | S        | synonymous        | NA                      | Yes       | Clade Ib |         | OPG068   |
| 52895  | reverse   | T->C |       | No     | ACA          | T         | GCA         | A        | nonsynonymous     | moderately conservative | No        | Clade Ib |         | OPG071   |
| 54708  | forward   | A->G |       | No     | CCA          | P         | CCG         | P        | synonymous        | NA                      | No        | Clade Ib |         | OPG072   |
| 64899  | forward   | T->A |       | No     | CTA          | L         | CAA         | Q        | nonsynonymous     | moderately radical      | No        | Clade Ib |         | OPG084   |
| 69405  | forward   | C->T | TC    | Yes    | CAA          | Q         | TAA         | *        | nonsense          | NA                      | No        | Clade Ib |         | OPG087   |
| 78083  | forward   | T->C |       | No     | CTA          | L         | CCA         | P        | nonsynonymous     | moderately conservative | Yes       | Clade Ib |         | OPG100   |
| 78255  | forward   | G->A | GG    | No     | TCG          | S         | TCA         | S        | synonymous        | NA                      | No        | Clade Ib |         | OPG100   |
| 79916  | forward   | G->A | GA    | Yes    | CGA          | R         | CAA         | Q        | nonsynonymous     | conservative            | No        | Clade Ib |         | OPG102   |
| 80681  | reverse   | G->A | GT    | No     | ACG          | T         | ATG         | M        | nonsynonymous     | moderately conservative | No        | Clade Ib |         | OPG104   |
| 88616  | reverse   | G->A | GT    | No     | CAC          | H         | CAT         | H        | synonymous        | NA                      | No        | Clade Ib |         | OPG109   |
| 91583  | forward   | G->A | GT    | No     | CGT          | R         | CAT         | H        | nonsynonymous     | conservative            | No        | Clade Ib |         | OPG112   |
| 108459 | reverse   | G->A | GT    | No     | TAC          | Y         | TAT         | Y        | synonymous        | NA                      | No        | Clade Ib |         | OPG127   |
| 110338 | reverse   | C->A |       | No     | AAG          | K         | AAT         | N        | nonsynonymous     | moderately conservative | No        | Clade Ib |         | OPG129   |
| 111091 | reverse   | A->G |       | No     | TAG          | *         | CAG         | Q        | nonsynonymous     | NA                      | No        | Clade Ib |         | OPG130   |
| 111249 | reverse   | C->T | CC    | No     | CGG          | R         | CAG         | Q        | nonsynonymous     | conservative            | No        | Clade Ib |         | OPG130   |
| 119651 | forward   | C->T | GC    | No     | AGC          | S         | AGT         | S        | synonymous        | NA                      | No        | Clade Ib |         | OPG137   |
| 120932 | reverse   | G->A | GT    | No     | ACA          | T         | ATA         | I        | nonsynonymous     | moderately conservative | No        | Clade Ib |         | OPG138   |
| 120962 | reverse   | C->T | CC    | No     | TGG          | W         | TAG         | *        | nonsense          | NA                      | No        | Clade Ib |         | OPG138   |
| 123914 | reverse   | G->T |       | No     | TCC          | S         | TCA         | S        | synonymous        | NA                      | No        | Clade Ib |         | OPG144   |
| 123987 | forward   | G->A | GC    | No     | TAG          | *         | TAA         | *        | synonymous        | NA                      | No        | Clade Ib |         | OPG145   |
| 126456 | forward   | C->A |       | No     | CAA          | Q         | AAA         | K        | nonsynonymous     | moderately conservative | No        | Clade Ib |         | OPG148   |
| 132286 | forward   | A->G |       | No     | AAC          | N         | GAC         | D        | nonsynonymous     | conservative            | No        | Clade Ib |         | OPG151   |

| site   | direction | snp  | dimer | apobec | parent codon | parent aa | child codon | child aa | mutation_category | prediction              | homoplasy | Cluster  | Remarks | gene-OPG |
|--------|-----------|------|-------|--------|--------------|-----------|-------------|----------|-------------------|-------------------------|-----------|----------|---------|----------|
| 132024 | forward   | G->A | GA    | Yes    | ACG          | T         | ACA         | T        | synonymous        | NA                      | No        | Clade Ib |         | OPG151   |
| 136425 | reverse   | G->A | GT    | No     | GAC          | D         | GAT         | D        | synonymous        | NA                      | No        | Clade Ib |         | OPG153   |
| 145002 | reverse   | A->T |       | No     | TAT          | Y         | TAA         | *        | nonsense          | NA                      | No        | Clade Ib |         | OPG167   |
| 148361 | reverse   | C->T | AC    | No     | TGT          | C         | TAT         | Y        | nonsynonymous     | radical                 | No        | Clade Ib |         | OPG174   |
| 149955 | forward   | A->G |       | No     | ACT          | T         | GCT         | A        | nonsynonymous     | moderately conservative | No        | Clade Ib |         | OPG176   |
| 150310 | forward   | G->A | GC    | No     | CGC          | R         | CAC         | H        | nonsynonymous     | conservative            | No        | Clade Ib |         | OPG176   |
| 150200 | forward   | T->A |       | No     | TTT          | F         | TTA         | L        | nonsynonymous     | conservative            | Yes       | Clade Ib |         | OPG176   |
| 154518 | forward   | T->C |       | No     | TGT          | C         | TGC         | C        | synonymous        | NA                      | No        | Clade Ib |         | OPG181   |
| 159332 | forward   | C->T | AC    | No     | AAC          | N         | AAT         | N        | synonymous        | NA                      | No        | Clade Ib |         | OPG185   |
| 162942 | forward   | A->C |       | No     | ATA          | I         | CTA         | L        | nonsynonymous     | conservative            | No        | Clade Ib |         | OPG188   |
| 182469 | forward   | C->T | GC    | No     | GCG          | A         | GTG         | V        | nonsynonymous     | moderately conservative | No        | Clade Ib |         | OPG210   |
| 184213 | forward   | G->T |       | No     | GAG          | E         | GAT         | D        | nonsynonymous     | conservative            | No        | Clade Ib |         | OPG210   |
