# Supplementary material for: Clade I Mpox virus genomic diversity in the Democratic Republic of the Congo, 2018 - 2024: Predominance of Zoonotic Transmission
Source: bioRxiv or medRxiv preprint supplement (doi:10.1101/2024.08.13.24311951), 2024-08-22
Supplement: Supplementary file [file media-2.pdf]

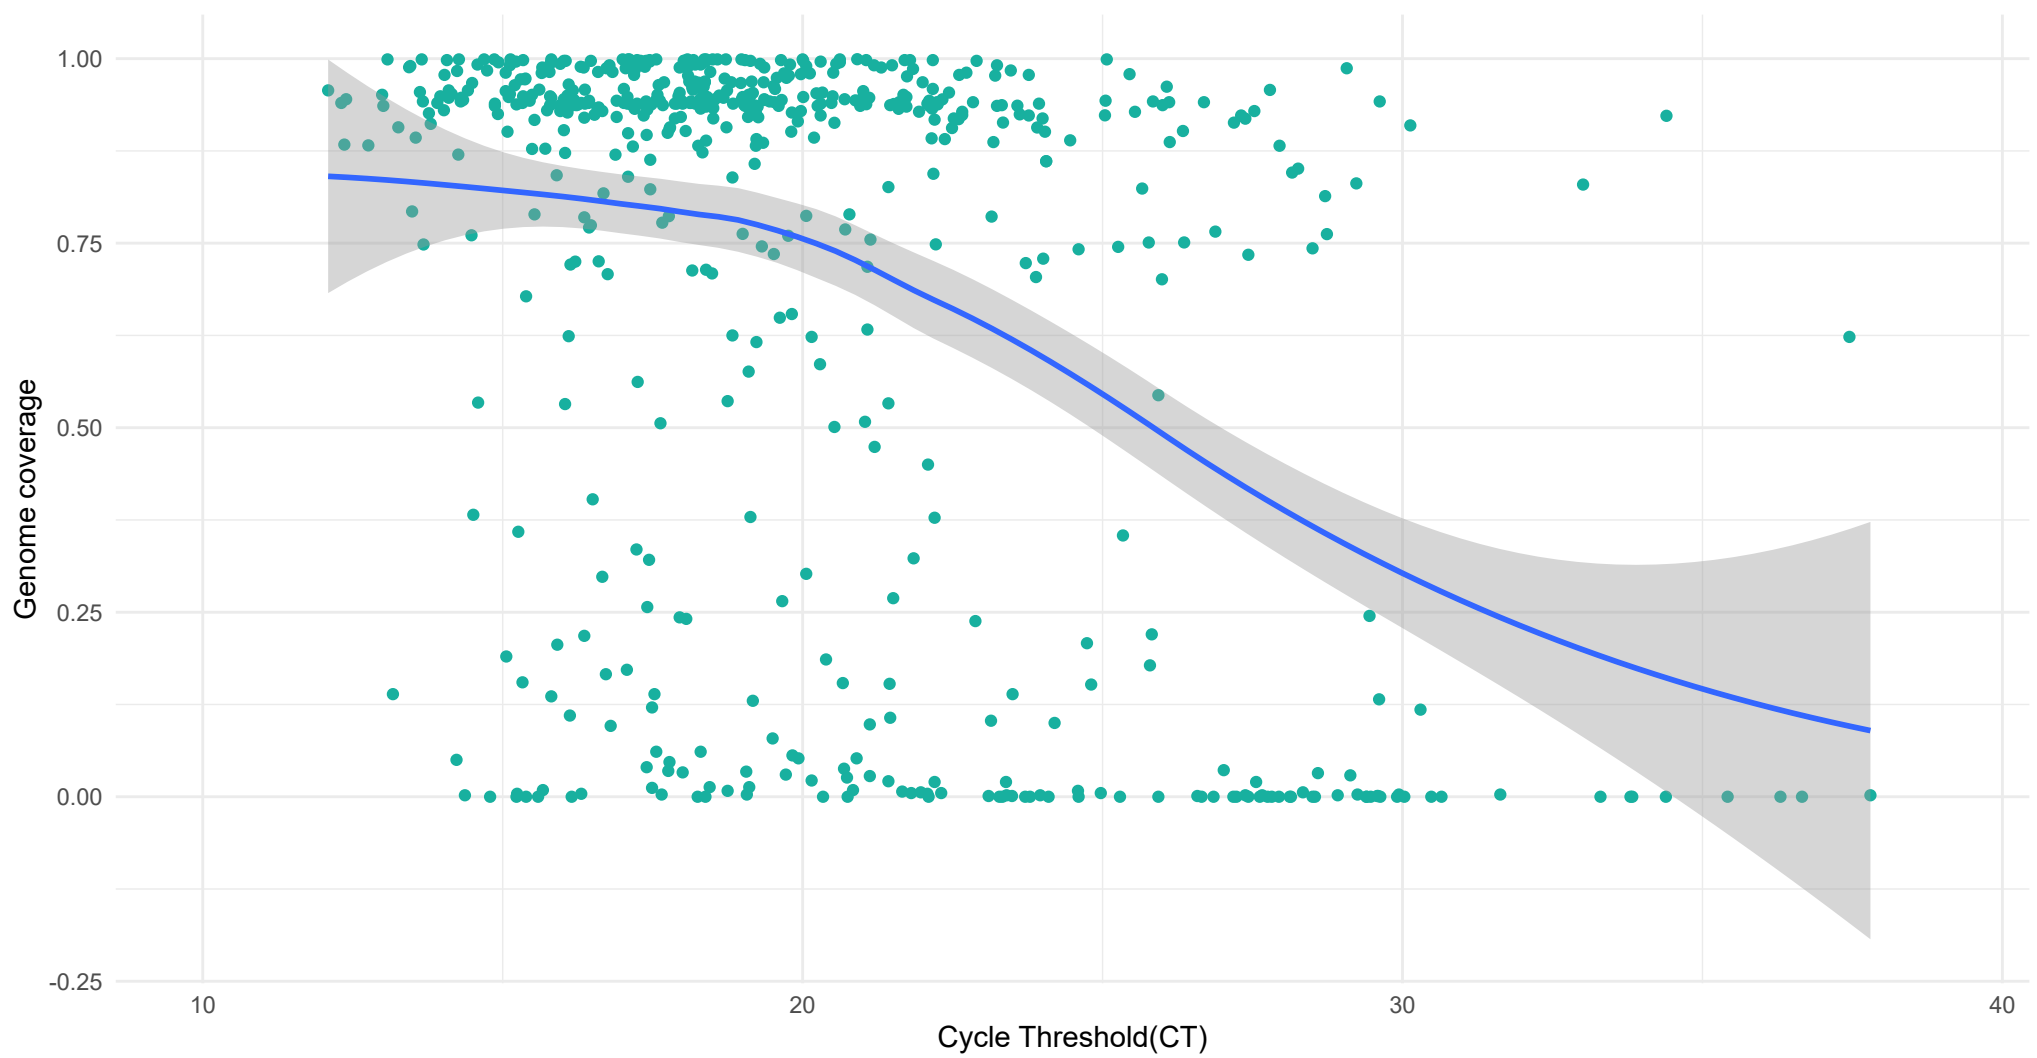

**Figure S1 :**  
**Scatterplot of genome called coverage vs PCR Cycle threshold**
