# Supplementary material for: Clade I Mpox virus genomic diversity in the Democratic Republic of the Congo, 2018 - 2024: Predominance of Zoonotic Transmission
Source: bioRxiv or medRxiv preprint supplement (doi:10.1101/2024.08.13.24311951), 2024-08-22
Supplement: Supplementary file [file media-4.pdf]

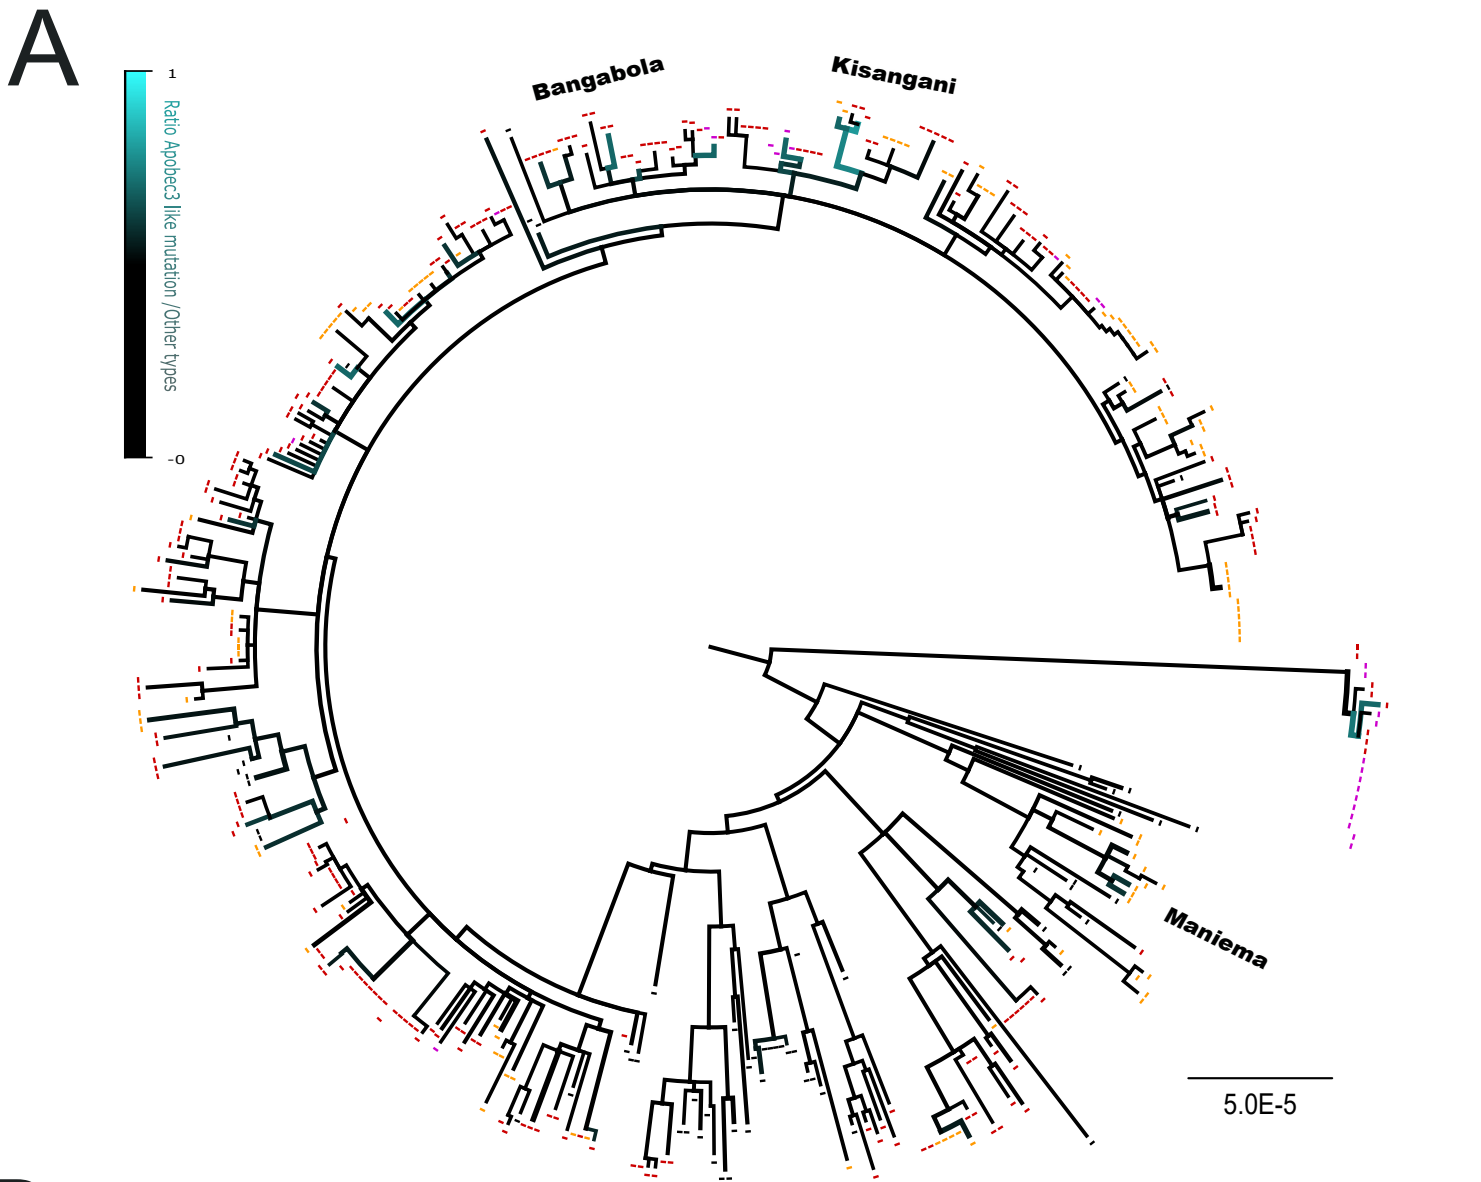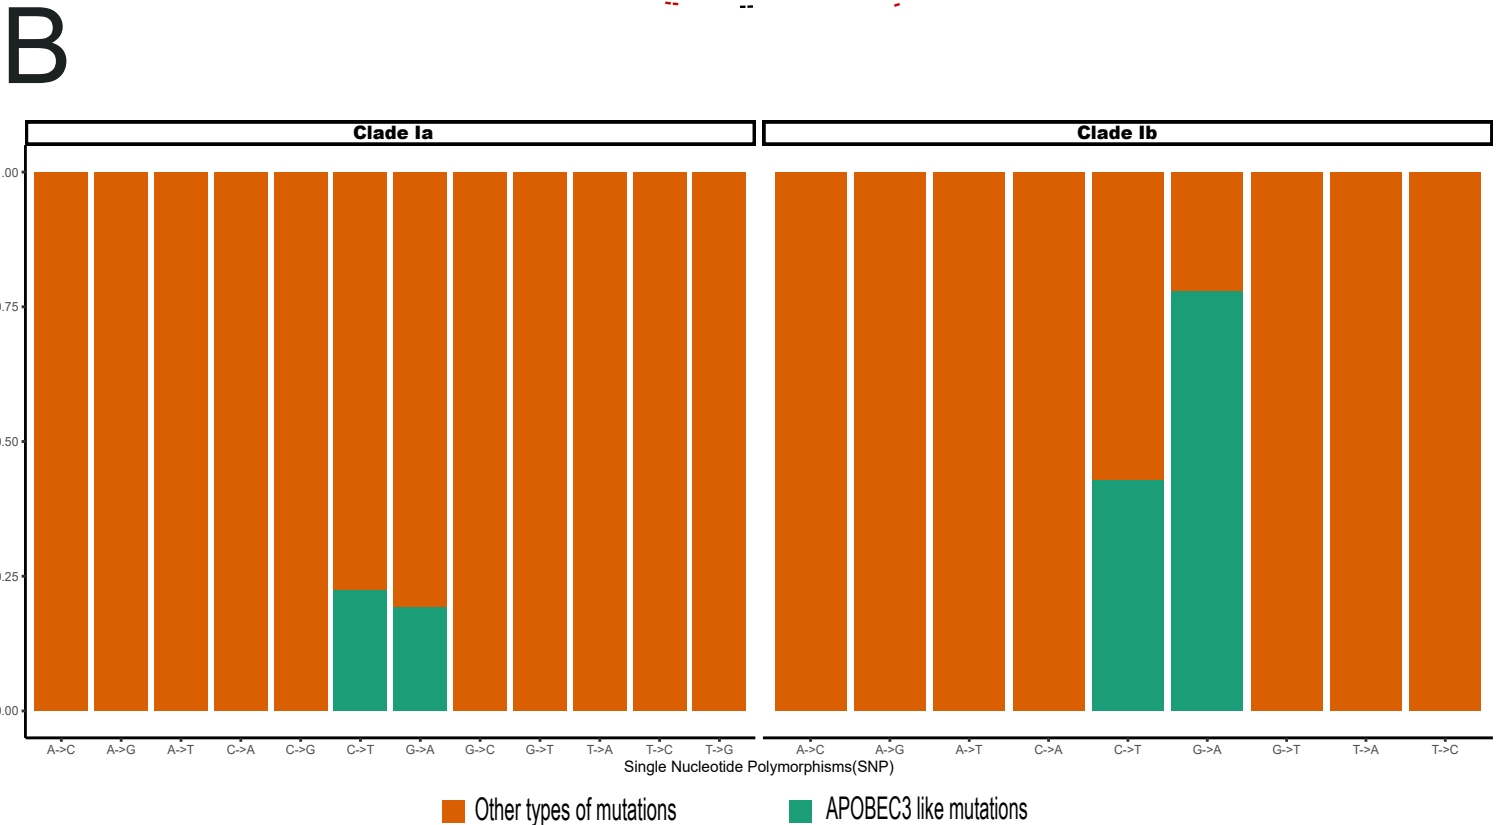

**Figure S3 :**

(A) Apobec3 analysis box at tips are colored by the year (black = prior 2022, orange = 2022, red = 2023, purple = 2024) and branches width and color gradient to cyan are consistent with proportion apobec3 mutations/others-  
 (B) Proportion of Single Nucleotide Polymorphism and apobec like mutations per subclade within Clade I
